# Supplementary material
Source: PubMed Central journal article supplement (PMC7749853)
Supplement: NIHMS1617168-supplement-Supplemental_Materials.pdf [file NIHMS1617168-supplement-Supplemental_Materials.pdf]

**Supplemental Figure 1**

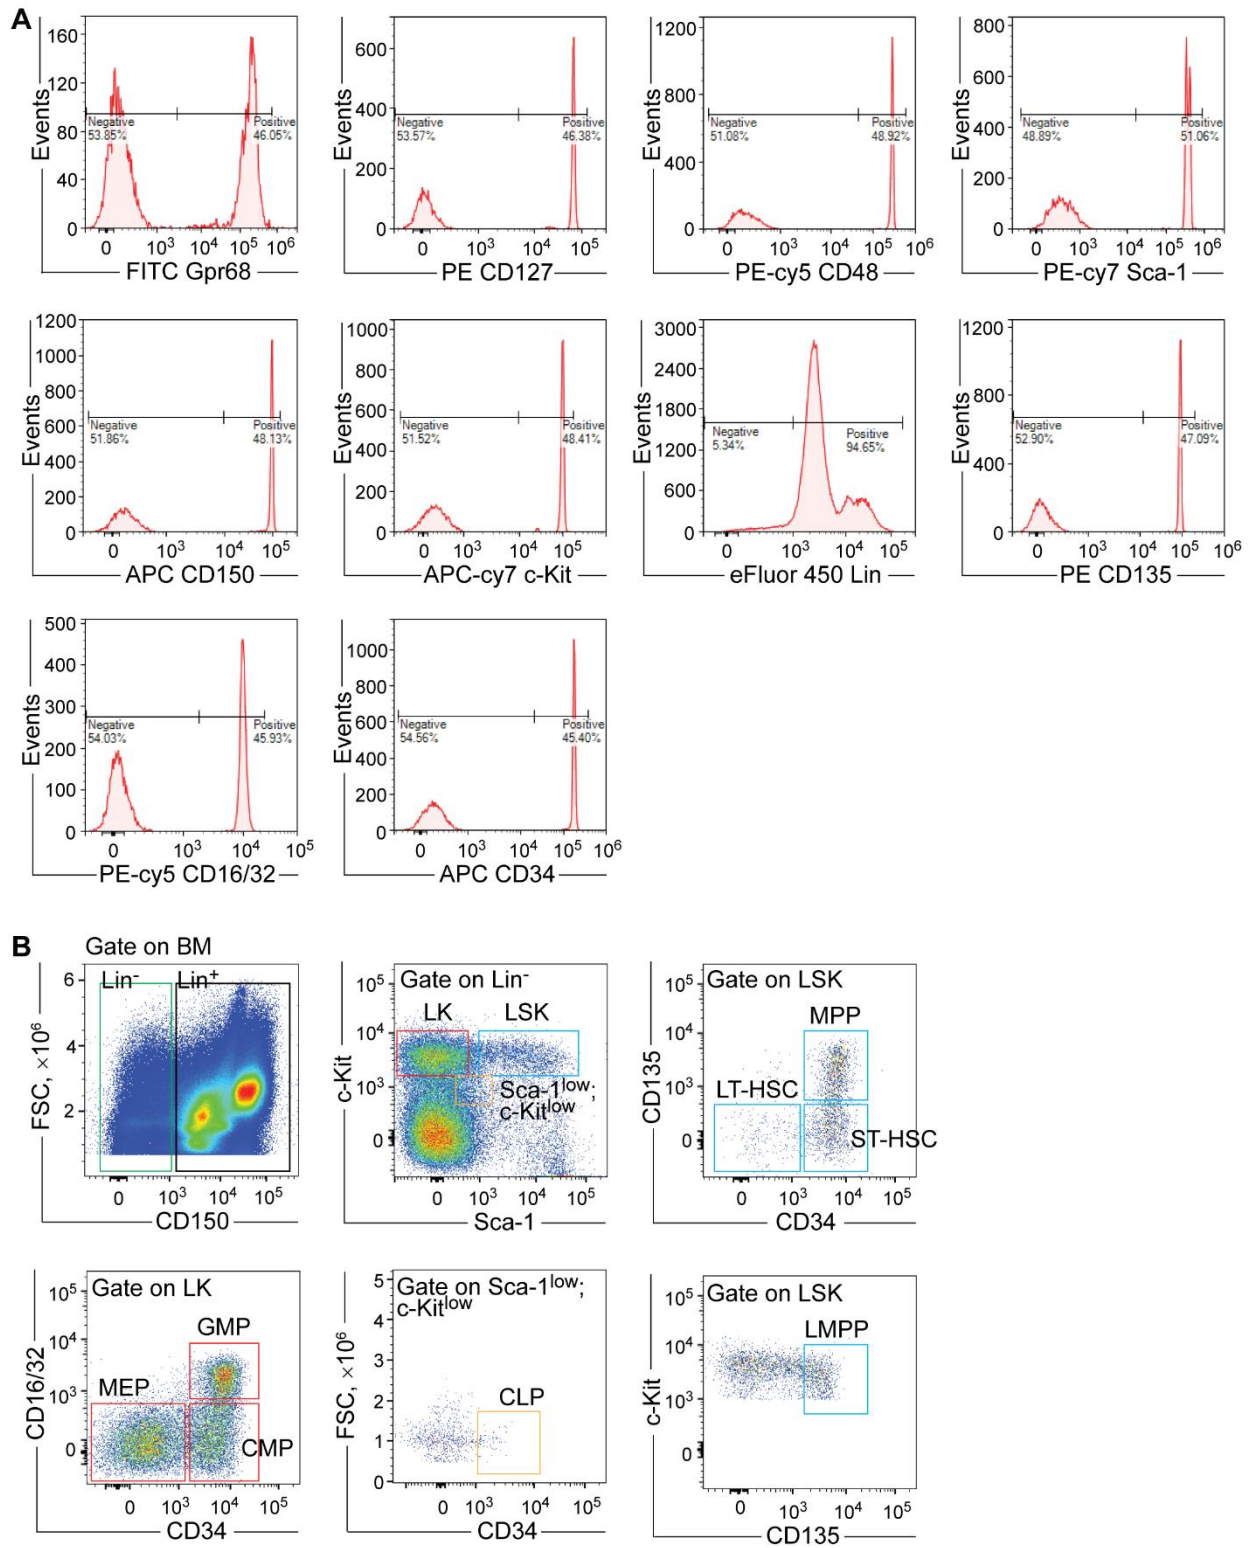

**Supplemental Figure 1. Gating strategy for Gpr68 expression on HSPC subpopulations.**

**(A)** Single staining control for the antibodies used to examine Gpr68 expression on HSPC subpopulations. **(B)** Gating strategy for HSPC subpopulations. Briefly, lineage<sup>+</sup> and lineage<sup>-</sup> cells were gated on BM MNC based on lineage markers, i.e. CD3, B220, CD11b, Gr-1, Ter119. Within the lineage<sup>-</sup> BM cells, Sca-1 and c-Kit were used to identify lineage<sup>-</sup>, Sca-1<sup>+</sup>, c-Kit<sup>+</sup> (LSK) cells and lineage<sup>-</sup>, Sca-1<sup>+</sup>, c-Kit<sup>-</sup> (LK) cells. Within the LSK cells, CD34 and CD135 were used to identify long-term HSC (LT-HSC, lineage<sup>-</sup>, Sca-1<sup>+</sup>, c-Kit<sup>+</sup>, CD34<sup>-</sup> and CD135<sup>-</sup>), short-term HSC (ST-HSC, lineage<sup>-</sup>, Sca-1<sup>+</sup>, c-Kit<sup>+</sup>, CD34<sup>+</sup>, and CD135<sup>-</sup>) and multipotent progenitor cells (MPP, lineage<sup>-</sup>, Sca-1<sup>+</sup>, c-Kit<sup>+</sup>, CD34<sup>+</sup> and CD135<sup>+</sup>). Within the LK cells, CD34 and CD16/32 were used to identify common myeloid progenitor cells (CMP, lineage<sup>-</sup>, Sca-1<sup>-</sup>, c-Kit<sup>+</sup>, CD34<sup>+</sup> and CD16/32<sup>-</sup>), megakaryocyte erythroid progenitor cells (MEP, lineage<sup>-</sup>, Sca-1<sup>-</sup>, c-Kit<sup>+</sup>, CD34<sup>-</sup> and CD16/32<sup>-</sup>) and granulocyte monocyte progenitor cells (GMP, lineage<sup>-</sup>, Sca-1<sup>-</sup>, c-Kit<sup>+</sup>, CD34<sup>+</sup> and CD16/32<sup>+</sup>). Lymphoid-primed multipotent progenitor cells (LMPP) were identified as lineage<sup>-</sup>, Sca-1<sup>+</sup>, c-Kit<sup>+</sup> and CD135<sup>+</sup>. Common lymphoid progenitor cells (CLP) were identified as lineage<sup>-</sup>, Sca-1<sup>low</sup>, c-Kit<sup>low</sup> and CD127<sup>+</sup>.

## Supplemental Figure 2

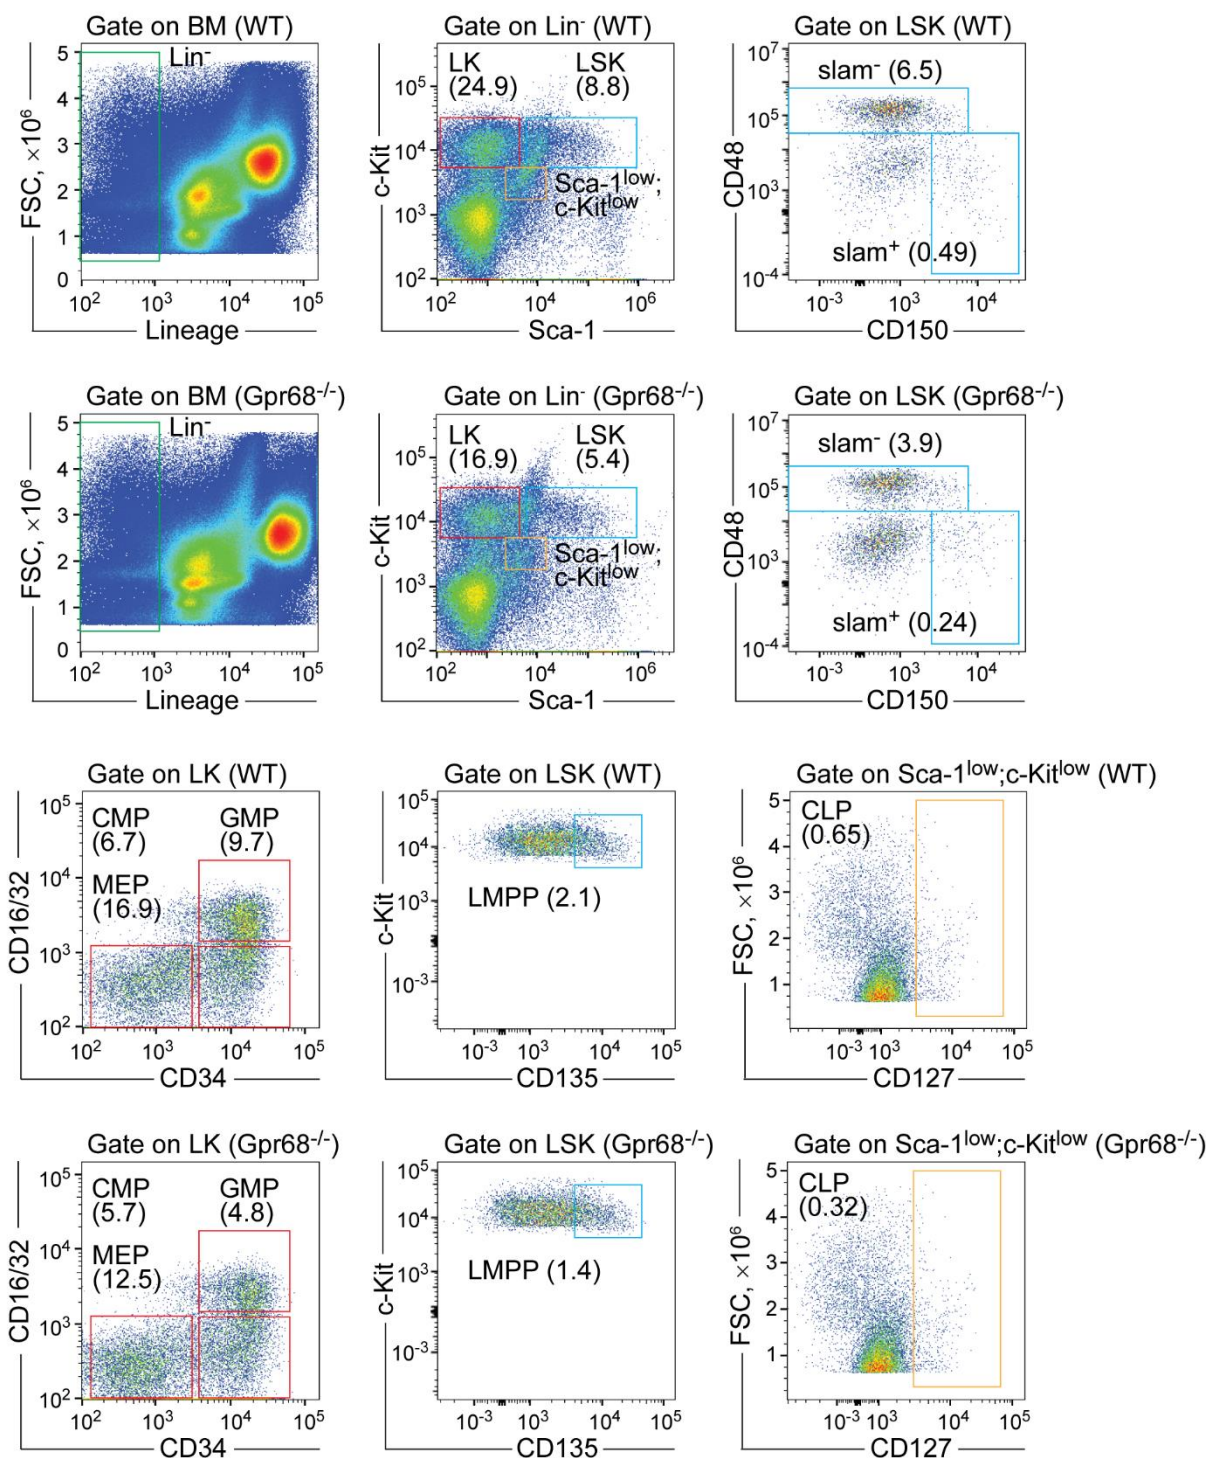

**Supplemental Figure 2. Numbers of HSPC in BM from WT and *Gpr68*<sup>-/-</sup> mice.** Representative flow cytometric analysis of HSPC in BM from WT and *Gpr68*<sup>-/-</sup> mice (4~5 months old).

### Supplemental Figure 3

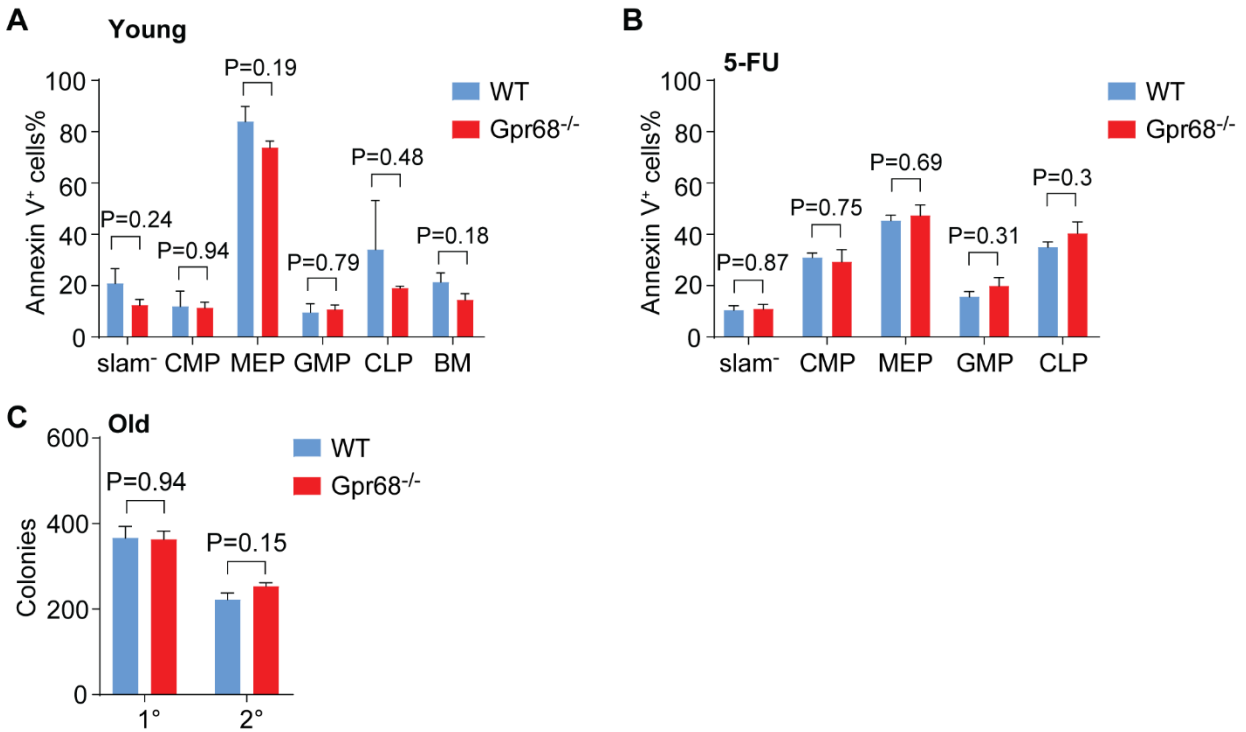

### Supplemental Figure 3. Cellular features are not altered in HSC from Gpr68<sup>-/-</sup> mice. (A-B)

Frequency of Annexin V<sup>+</sup> cells in HSPC and BM lineage<sup>+</sup> cells from WT and Gpr68<sup>-/-</sup> mice at young age (4~5 months old, n=3, A) and post 5-FU injection (8 months old, n=5, B). (C) Numbers of colonies formed by BM MNC from WT and Gpr68<sup>-/-</sup> mice after primary (1°) and secondary (2°) replating (12 months old, n=3).

### Supplemental Figure 4

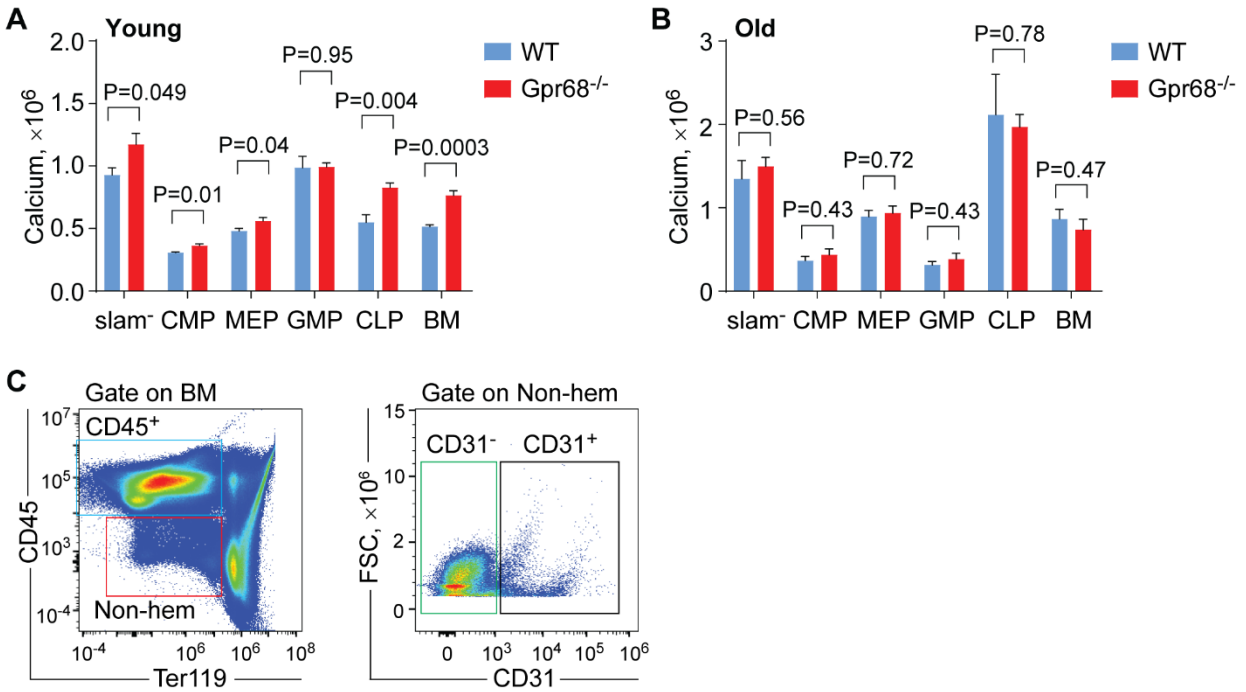

**Supplemental Figure 4. Signaling pathways in HSPC from Gpr68<sup>-/-</sup> mice. (A-B)** Cytosolic Ca<sup>2+</sup> levels in HSPC subpopulations from WT and Gpr68<sup>-/-</sup> mice at young age (4~5 months old, n=5, A) and upon aging (10~11 months old, n=5, B). **(C)** Flow cytometric analysis of hematopoietic cells (CD45<sup>+</sup>), non-hematopoietic cells (CD45<sup>-</sup> and Ter119<sup>-</sup>), CD31<sup>+</sup> and CD31<sup>-</sup> cells in BM from C57Bl6 mice.
